# Supplementary material
Source: MDPI journal article supplement (https://www.mdpi.com/2227-9040/11/11/567)
Supplement: s1 [file s1 › chemosensors-2602575-supplementary.pdf]

# Quantitative Analysis of Meteorite Elements Based on the Multidimensional Scaling–Back Propagation Neural Network Algorithm Combined with Raman Mapping-Assisted Micro-Laser Induced Breakdown Spectroscopy

Hongpeng Wang <sup>1,4,†</sup>, Yingjian Xin <sup>1,3,†</sup>, Peipei Fang <sup>1,2,3</sup>, Yian Wang <sup>2,3</sup>, Mingkang Duan <sup>1,3</sup> and Wenming Wu <sup>5</sup>,  
Ruidong Yang <sup>6</sup>, Sicong Liu <sup>4</sup>, Liang Zhang <sup>1,\*</sup> and Xiong Wan <sup>1,2,\*</sup>

<sup>1</sup> Key Laboratory of Space Active Opto-Electronics Technology of the Chinese Academy of Sciences, Shanghai Institute of Technical Physics, Chinese Academy of Sciences, Shanghai 200083, China; 2010965@tongji.edu.cn (H.W.); simpson@mail.ustc.edu.cn (Y.X.); fangpei20@mails.ucas.ac.cn (P.F.); duanmingkang22@mails.ucas.ac.cn (M.D.)

<sup>2</sup> Key Laboratory of Systems Health Science of Zhejiang Province, School of Life Science, Hangzhou Institute for Advanced Study, University of Chinese Academy of Sciences, Hangzhou 310024, China fangpei20@mails.ucas.ac.cn (P.F.); wangyian22@mails.ucas.ac.cn (Y.W.); wanxiong@mail.sitp.ac.cn (X.W.)

<sup>3</sup> University of the Chinese Academy of Sciences, Beijing 100049, China; simpson@mail.ustc.edu.cn (Y.X.); fangpei20@mails.ucas.ac.cn (P.F.); wangyian22@mails.ucas.ac.cn (Y.W.); duanmingkang22@mails.ucas.ac.cn (M.D.)

<sup>4</sup> College of Surveying and Geo-Informatics, Tongji University, Shanghai 200092, China; sicong.liu@tongji.edu.cn

<sup>5</sup> Geological Brigade 105, Bureau of Geology and Mineral Exploration and Development of Guizhou Province, Guiyang 550018, China; wenmingwu84@163.com (W.W.);

<sup>6</sup> College of Resources and Environmental Engineering, Guizhou University, Guiyang 550025, China; rdyang@gzu.edu.cn (R.Y.)

\* Correspondence: zhliang@mail.sitp.ac.cn (L.Z.); wanxiong@mail.sitp.ac.cn (X.W.)

† These authors contributed equally to this work.

Table S1 Chemical composition reference of certified reference materials (in wt%)

| No. | Reference ID     | Material                                                | Fe     | Mg     | Na    |
|-----|------------------|---------------------------------------------------------|--------|--------|-------|
| A1  | GBW03101a        | Clay                                                    | 7.385  | 0.276  | 0.045 |
| A2  | GBW03115         | Soft clay                                               | 0.602  | 0.18   | 1.291 |
| A3  | GBW07127         | Carbonate rock                                          | 0.1351 | 4.056  | 0.016 |
| A4  | GBW03121a        | Kaolin                                                  | 1.05   | 0.0414 | 0.033 |
| A5  | GBW07105(GSR-3)  | Basalt                                                  | 9.38   | 4.662  | 2.508 |
| A6  | GBW07125         | Pegmatite                                               | 0.168  | 0.078  | 1.187 |
| A7  | GBW07217a        | Dolomite                                                | 0.1568 | 12.222 | 0.017 |
| A8  | GBW07104(GSR-2)  | Andesite                                                | 3.43   | 1.032  | 2.864 |
| A9  | GBW07121(GSR-14) | Granitic gneiss                                         | 2.184  | 0.978  | 3.932 |
| A11 | GBW03104         | Shale                                                   | 3.969  | 0.402  | 0.148 |
| B1  | GBW07106(GSR-4)  | Quartz sandstone                                        | 2.254  | 0.0492 | 0.045 |
| B2  | GBW07108(GSR-6)  | Argillaceous limestone                                  | 1.764  | 3.114  | 0.059 |
| B3  | GBW07163(GSO-2)  | Polymetallic ore                                        | 8.4    | 0.834  | 0.178 |
| B4  | GBW07309(GSD9)   | Namucuo sediments                                       | 3.402  | 1.434  | 1.068 |
| B5  | GBW07377(GSD-26) | Namucuo sediments, Tibet                                | 3.612  | 1.038  | 0.616 |
| B6  | GBW07390(GSS-34) | Floodplain sediment                                     | 4.032  | 1.596  | 1.150 |
| B7  | GBW07405(GSS-5)  | Yellow-red soil                                         | 8.834  | 0.366  | 0.089 |
| B8  | GBW07407(GSS-7)  | Latosol                                                 | 13.132 | 0.156  | 0.059 |
| B10 | GBW07447(GSS-18) | Saline alkali soil in Hangjinhou banner, Inner Mongolia | 2.541  | 1.548  | 2.263 |
| B11 | GBW07449(GSS-20) | Saline alkali soil in Shanshan, Xinjiang                | 2.884  | 1.788  | 6.670 |
| B12 | GBW07450(GSS-21) | Lime calcium soil in Shihezi City, Xinjiang             | 2.849  | 1.224  | 1.499 |
| B13 | GBW07453(GSS-24) | Yangjiang Nanhai beach sediment                         | 3.479  | 0.696  | 0.616 |
| C1  | GBW03123         | Wollastonite                                            | 0.07   | 0.57   | 0.039 |

## Supporting Information

|     |                 |                        |        |       |       |
|-----|-----------------|------------------------|--------|-------|-------|
| C2  | GBW03125        | Nepheline syenite      | 0.231  | 0.552 | 9.341 |
| C3  | GBW03107a       | Limestone              | 0.406  | 1.074 | 0.020 |
| D3  | GBW07103(GSR-1) | Granite                | 1.498  | 0.252 | 2.322 |
| D4  | GBW07107(GSR-5) | Shale                  | 5.32   | 1.206 | 0.260 |
| D5  | GBW07146        | Nickel ore             | 7.497  | 8.736 | 1.180 |
| D6  | GBW07162(GSO-1) | Polymetallic lean ore  | 4.67   | 0.93  | 0.505 |
| D7  | GBW07164(GSO-3) | Copper rich silver ore | 11.4   | 1.398 | 0.401 |
| D8  | GBW07165(GSO-4) | Lead zinc rich ore     | 13.72  | 0.354 | 0.022 |
| D9  | GBW07235        | Lead ore               | 3.059  | 0.972 | 1.195 |
| D10 | GBW07236        | Lead ore               | 2.653  | 1.236 | 0.049 |
| D11 | GBW07239        | Molybdenum ore         | 10.262 | 1.098 | 0.571 |

According to cluster analysis, all spectra within the Raman mapping scanning area are classified into three categories, with 7 detection points defined as sample 1, 3180 detection points defined as sample 2, and 944 detection points defined as sample 3.

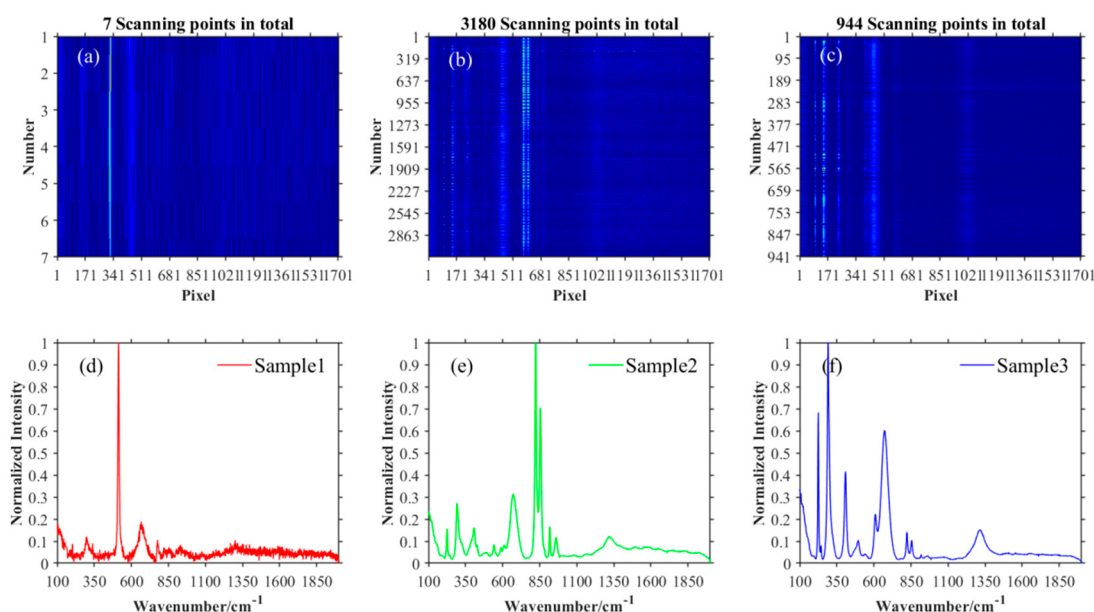

Figure S1 Three types of substances identified and their Raman spectra. (a) Detector response of Raman signals at 7 detection points; (b) Detector response of Raman signals at 3180 detection points; (c) Detector response of Raman signals at 944 detection points; (d) Average Raman spectra of 7 detection points; (e) Average Raman spectra of 3180 detection points; (f) Average Raman spectra of 944 detection points.

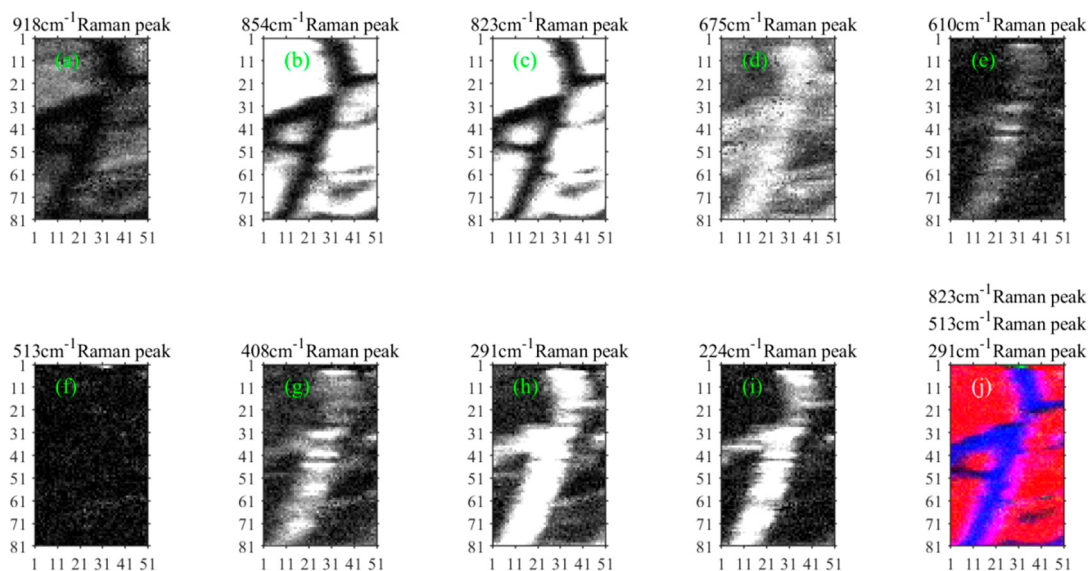

Figure S2 Mapping of different Raman peaks. (a) Mapping of Raman peaks at 918 cm<sup>-1</sup>; (b) Mapping of Raman

## Supporting Information

peaks at  $854\text{ cm}^{-1}$ ; (c) Mapping of Raman peaks at  $823\text{ cm}^{-1}$ ; (d) Mapping of Raman peaks at  $675\text{ cm}^{-1}$ ; (e) Mapping of Raman peaks at  $610\text{ cm}^{-1}$ ; (f) Mapping of Raman peaks at  $513\text{ cm}^{-1}$ ; (g) Mapping of Raman peaks at  $408\text{ cm}^{-1}$ ; (h) Mapping of Raman peaks at  $291\text{ cm}^{-1}$ ; (i) Mapping of Raman peaks at  $224\text{ cm}^{-1}$ ; (j) Pseudo-color composite images of Raman peaks at wave numbers  $823$  (R channel),  $513$  (G channel), and  $291$  (B channel)  $\text{cm}^{-1}$ .

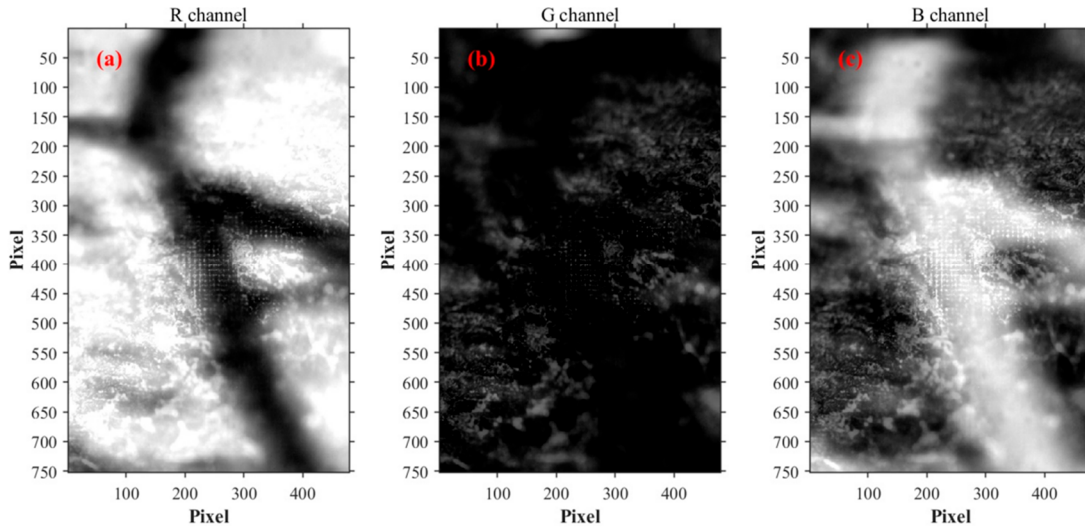

Figure S3 The gray-scale images of three channels. (a) Mapping of intensities of Raman peak at  $823\text{ cm}^{-1}$  (typical Raman peaks of sample 2); (b) Mapping of intensities of Raman peak at  $513\text{ cm}^{-1}$  (typical Raman peaks of sample 1); (c) Mapping of intensities of Raman peak at  $291\text{ cm}^{-1}$  (typical Raman peaks of sample 3).

33

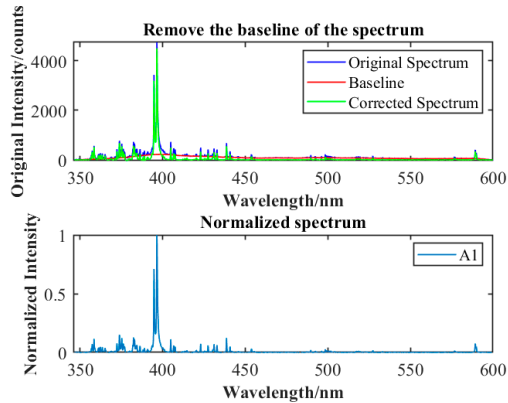

Figure S4 Spectral data preprocessing of A1

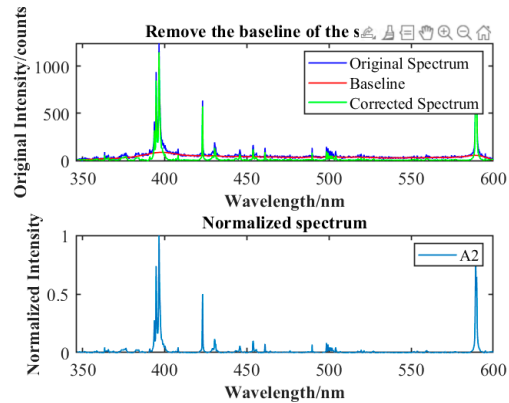

Figure S5 Spectral data preprocessing of A2

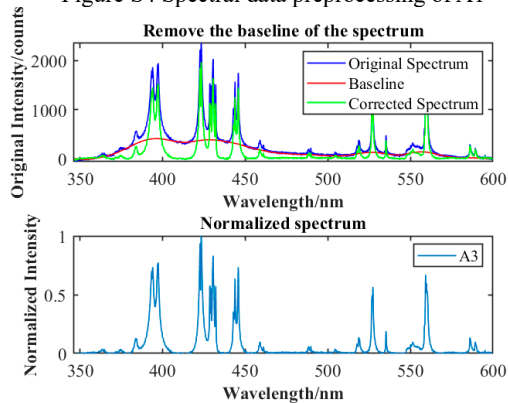

Figure S6 Spectral data preprocessing of A3

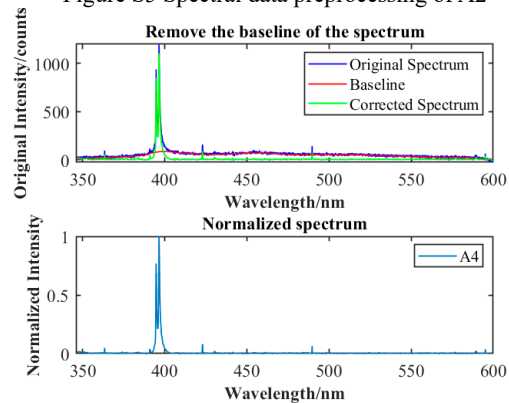

Figure S7 Spectral data preprocessing of A4

Figure S8 Spectral data preprocessing of A5

Figure S9 Spectral data preprocessing of A6

Figure S10 Spectral data preprocessing of A7

Figure S11 Spectral data preprocessing of A8

Figure S12 Spectral data preprocessing of A9

Figure S13 Spectral data preprocessing of A11

Figure S14 Spectral data preprocessing of B1

Figure S15 Spectral data preprocessing of B2

## Supporting Information

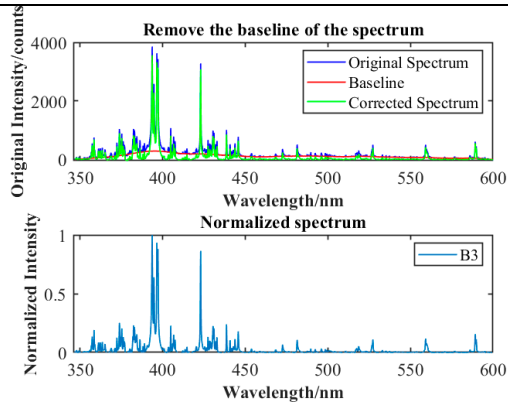

Figure S16 Spectral data preprocessing of B3

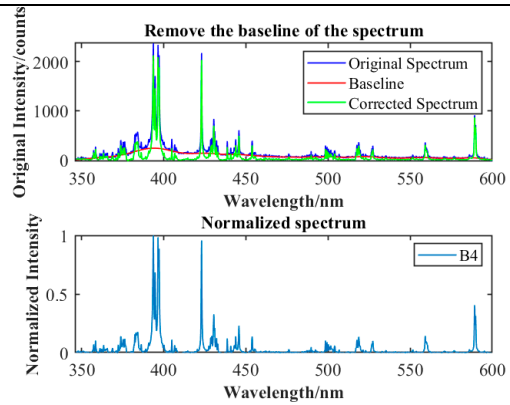

Figure S17 Spectral data preprocessing of B4

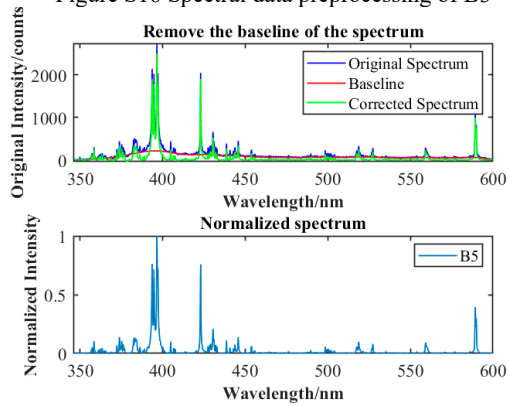

Figure S18 Spectral data preprocessing of B5

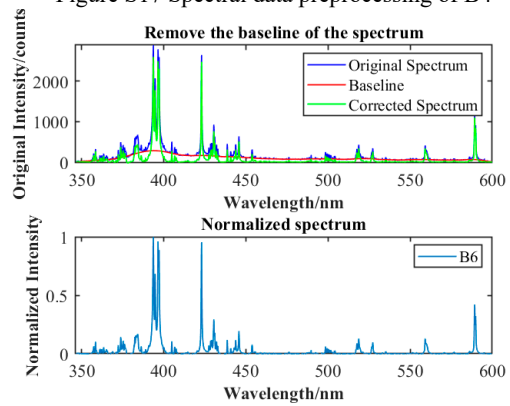

Figure S19 Spectral data preprocessing of B6

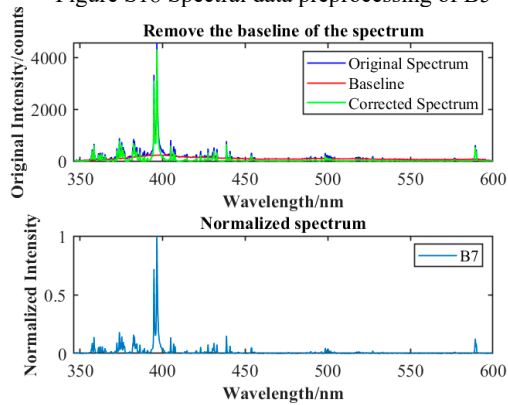

Figure S20 Spectral data preprocessing of B7

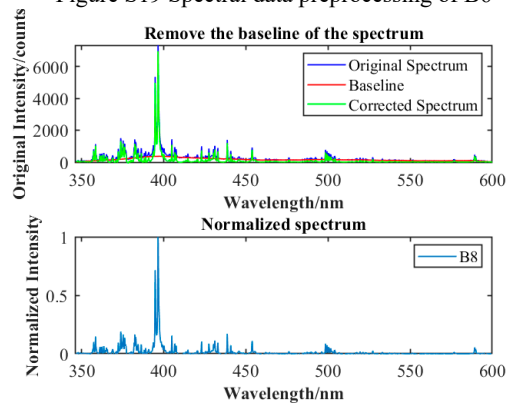

Figure S21 Spectral data preprocessing of B8

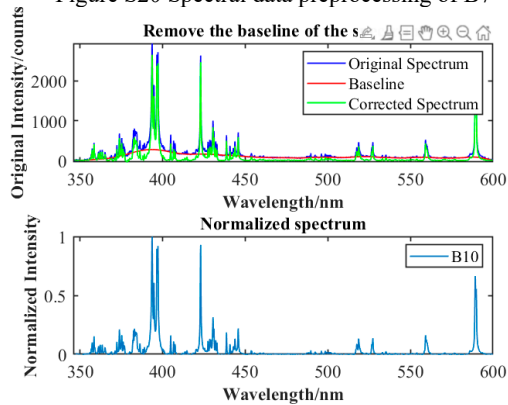

Figure S22 Spectral data preprocessing of B10

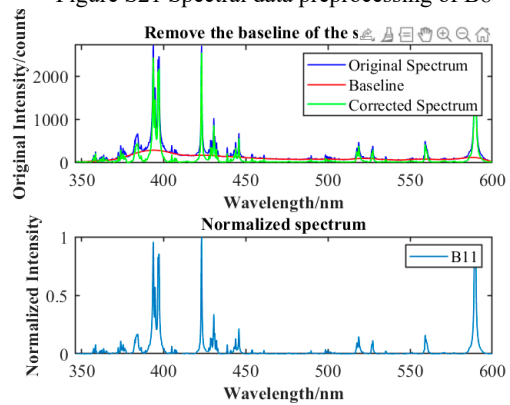

Figure S23 Spectral data preprocessing of B11

Figure S24 Spectral data preprocessing of B12

Figure S25 Spectral data preprocessing of B13

Figure S26 Spectral data preprocessing of C1

Figure S27 Spectral data preprocessing of C2

Figure S28 Spectral data preprocessing of C3

Figure S29 Spectral data preprocessing of D3

Figure S30 Spectral data preprocessing of D4

Figure S31 Spectral data preprocessing of D5

## Supporting Information

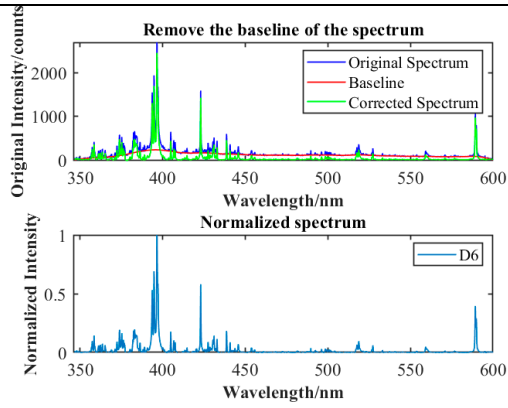

Figure S32 Spectral data preprocessing of D6

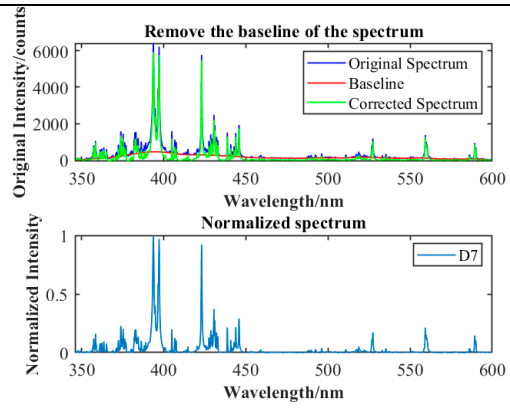

Figure S33 Spectral data preprocessing of D7

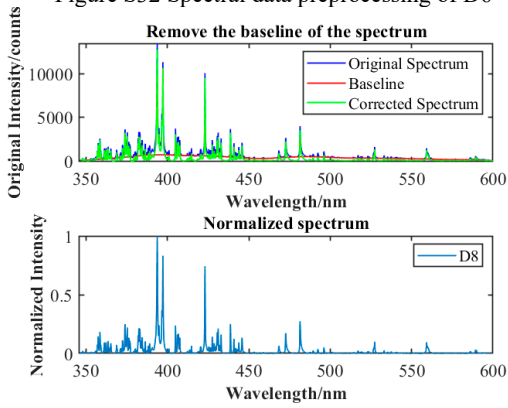

Figure S34 Spectral data preprocessing of D8

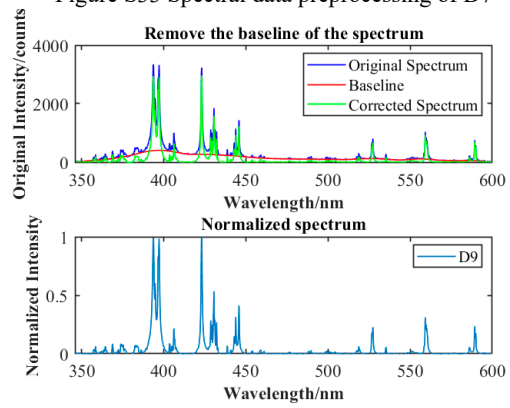

Figure S35 Spectral data preprocessing of D9

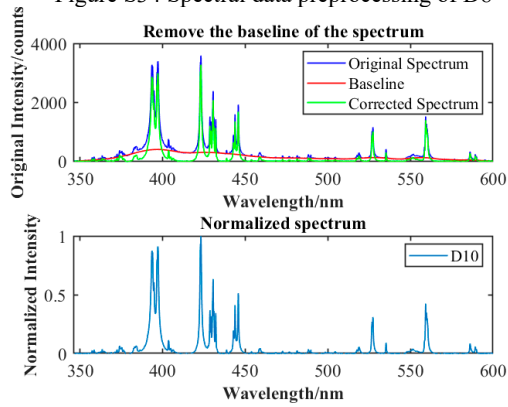

Figure S36 Spectral data preprocessing of D10

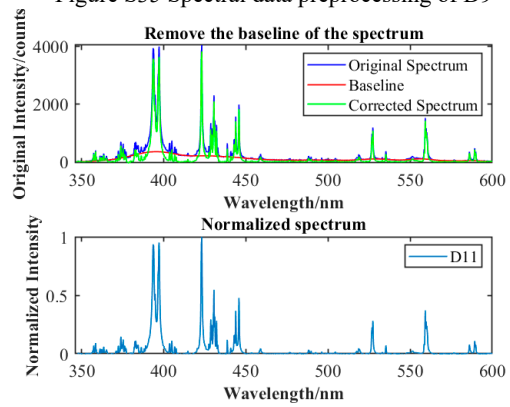

Figure S37 Spectral data preprocessing of D11
